# Supplementary material
Source: Springer Nature journal article supplement (https://www.springermedizin.de/resource/supplementary/12936_2012_2544_MOESM1_ESM.pdf/9543106)

Quinine

DIC

Quinine/DIC

3D7

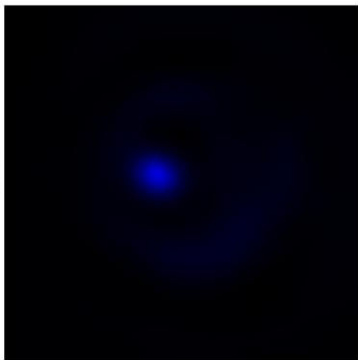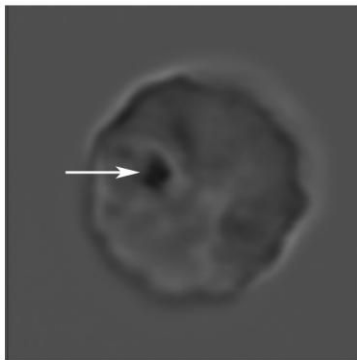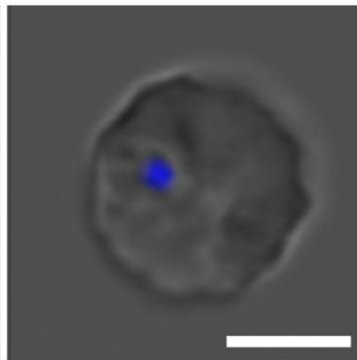

3D7

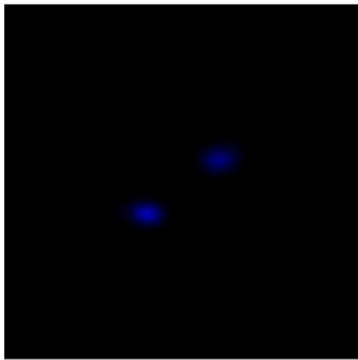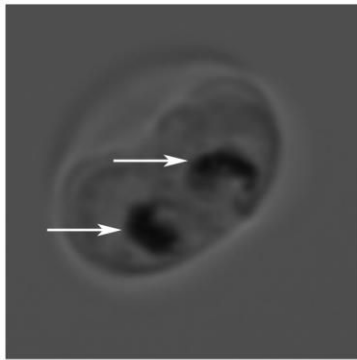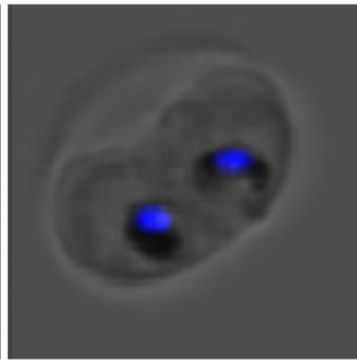

Dd2

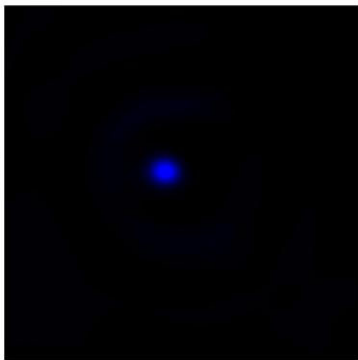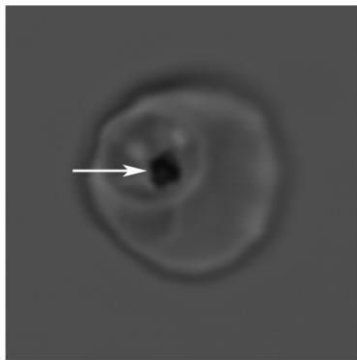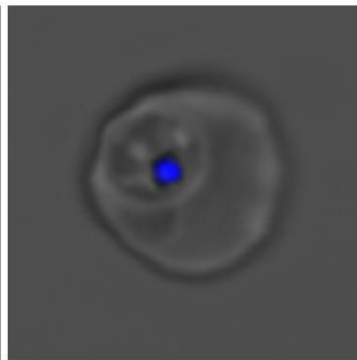

Dd2

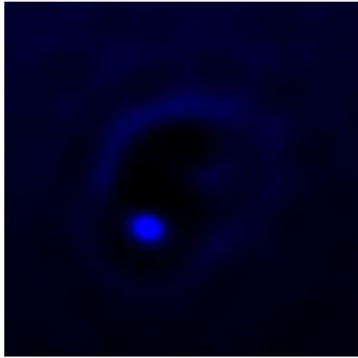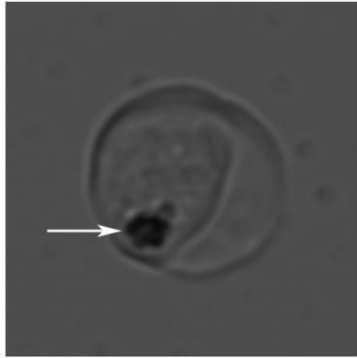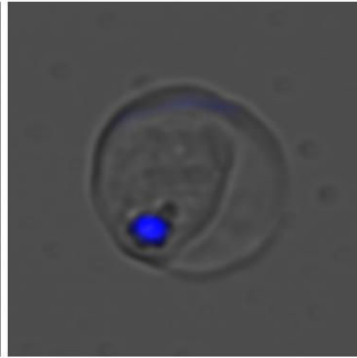

Supplement: MOESM1 [file 9543106]
